# Supplementary material for: Extracellular Vesicles Derived from Human Gingival Mesenchymal Stem Cells: A Transcriptomic Analysis
Source: Genes (Basel). 2020 Jan 21;11(2):118. doi: 10.3390/genes11020118 (PMC7073771; doi:10.3390/genes11020118)
Supplement: Supplementary file 1 [file genes-11-00118-s001.txt]

A1BG-AS1
A2M-AS1
ACBD3-AS1
ACTA2-AS1
ADIRF-AS1
ADORA2A-AS1
ADPGK-AS1
AFAP1-AS1
AFDN-DT
AGAP2-AS1
AP4B1-AS1
APOBEC3B-AS1
ARAP1-AS2
ARRDC1-AS1
ASB16-AS1
ASH1L-AS1
ATP13A4-AS1
ATP1A1-AS1
ATP2C2-AS1
ATXN8OS
B3GALT5-AS1
BAALC-AS2
BAIAP2-DT
BCAR4
BCDIN3D-AS1
BDNF-AS
BVES-AS1
C4A-AS1
C4B-AS1
C5orf64-AS1
C5orf66-AS1
C5orf66-AS2
CACTIN-AS1
CADM3-AS1
CARS1-AS1
CASC11
CASC2
CASC20
CASC21
CASC22
CASC23
CCDC183-AS1
CCNT2-AS1
CD27-AS1
CDKN2A-DT
CDKN2B-AS1
CIRBP-AS1
CLLU1
CLLU1-AS1
CNTN4-AS1
COL18A1-AS1
COL5A1-AS1
CTBP1-DT
DGCR9
DGUOK-AS1
DHRS4-AS1
DIO3OS
DIRC3
DIRC3-AS1
DLEU1
DLEU1-AS1
DLGAP1-AS1
DNAJC9-AS1
DNMBP-AS1
DSCR4
DSCR4-IT1
DSCR9
EGFR-AS1
EIF3J-DT
ELN-AS1
ENTPD1-AS1
F11-AS1
FAM138A
FAM138B
FAM138C
FAM138E
FAM157C
FAM181A-AS1
FAM182A
FAM182B
FAM225A
FAM225B
FAM230B
FAM41C
FAM74A1
FAM85B
FBXL19-AS1
FER1L6-AS2
FGD5-AS1
FLG-AS1
FTX
GARS1-DT
GAS5
GAS5-AS1
GAS6-AS1
GAS8-AS1
GAU1
GHRLOS
GNAS-AS1
GPRC5D-AS1
GSN-AS1
H19
HAND2-AS1
HCG25
HCG9
HLA-F-AS1
HOXA10-AS
HOXA11-AS
HOXA-AS3
HOXB-AS3
HTR3E-AS1
IBA57-DT
IDI2-AS1
IGBP1-AS2
IGSF11-AS1
IL6R-AS1
IPO9-AS1
IRF1-AS1
JAZF1-AS1
JMJD1C-AS1
JPX
KANSL1-AS1
KCNQ1OT1
KCTD21-AS1
KIF9-AS1
KRTAP5-AS1
KTN1-AS1
LAMTOR5-AS1
LEF1-AS1
LILRB1-AS1
LINC00092
LINC00115
LINC00173
LINC00174
LINC00242
LINC00243
LINC00254
LINC00265
LINC00266-1
LINC00271
LINC00273
LINC00283
LINC00313
LINC00336
LINC00471
LINC00477
LINC00482
LINC00518
LINC00533
LINC00632
LINC00637
LINC00649
LINC00654
LINC00663
LINC00667
LINC00852
LINC00868
LINC00882
LINC00893
LINC00894
LINC00907
LINC00910
LINC00917
LINC00937
LINC00938
LINC00939
LINC00957
LINC00963
LINC00967
LINC00987
LINC01001
LINC01096
LINC01106
LINC01123
LINC01135
LINC01140
LINC01151
LINC01193
LINC01547
LINC01549
LINC01550
LINC01551
LINC01565
LINC01588
LINC01590
LINC01619
LINC01620
LINC02579
LINC02582
LINC02693
LINC02694
LINC02860
LINC02875
LIPE-AS1
LNX1-AS2
LOH12CR2
LRP4-AS1
MALAT1
MAP3K20-AS1
MARCHF11-AS1
MATN1-AS1
MBNL1-AS1
MCM3AP-AS1
MDC1-AS1
MEG3
MIR1-1HG-AS1
MIR1302-10
MIR1302-11
MIR1302-9
MIR142
MIR155HG
MIR17HG
MIR194-2
MIR194-2HG
MIR202HG
MIR205HG
MIR219B
MIR22HG
MIR24-2
MIR296
MIR335
MIR4435-2HG
MIR451B
MIR497HG
MIR503HG
MIR570HG
MIR6080
MIR7-3HG
MIR99AHG
MORC2-AS1
MRGPRG-AS1
MYCBP2-AS1
NALCN-AS1
NAPA-AS1
NBR2
NDP-AS1
NEAT1
NORAD
NPHP3-AS1
NR2F1-AS1
OBI1-AS1
OBSCN-AS1
OIP5-AS1
OR2A1-AS1
OSTM1-AS1
OVCH1-AS1
PAPPA-AS2
PAXIP1-AS2
PCBP1-AS1
PCF11-AS1
PCOLCE-AS1
PHKA2-AS1
PINK1-AS
PITRM1-AS1
PLCE1-AS1
PRECSIT
PRKAR2A-AS1
PRNT
PRRT3-AS1
PSMB8-AS1
PSMG3-AS1
PTOV1-AS1
PTPRG-AS1
PVT1
RAD21-AS1
RFPL3S
RNU11
RNU1-1
RNU12
RNU1-2
RNU1-3
RNU1-4
RNU4ATAC
RNU6ATAC
RNVU1-1
RNVU1-14
RNVU1-15
RNVU1-17
RNVU1-18
RNVU1-19
RNVU1-2
RNVU1-20
RNVU1-21
RNVU1-22
RNVU1-23
RNVU1-24
RNVU1-25
RNVU1-26
RNVU1-27
RNVU1-28
RNVU1-29
RNVU1-2A
RNVU1-3
RNVU1-30
RNVU1-31
RNVU1-32
RNVU1-33
RNVU1-34
RNVU1-4
RNVU1-6
RNVU1-7
RNVU1-8
RPL34-AS1
RRM1-AS1
RUSC1-AS1
SBF2-AS1
SCARNA14
SCARNA17
SCARNA18
SCARNA2
SCARNA20
SCARNA21
SCARNA22
SCARNA23
SCARNA26A
SCARNA26B
SCARNA27
SCARNA28
SERTAD4-AS1
SH3BP5-AS1
SHANK2-AS3
SLC12A5-AS1
SLC5A4-AS1
SMAD1-AS1
SMARCA5-AS1
SNHG12
SNHG14
SNHG15
SNHG16
SNHG20
SNHG29
SNHG3
SNHG30
SNHG31
SNHG32
SNHG4
SNHG5
SNHG6
SNHG7
SNHG8
SNORA11
SNORA12
SNORA62
SNORA63
SNORA67
SNORA73A
SNORA73B
SNORA74A
SNORA74B
SNORD101
SNORD102
SNORD103A
SNORD103B
SNORD104
SNORD105
SNORD116-20
SNORD12C
SNORD13
SNORD14A
SNORD14B
SNORD15A
SNORD15B
SNORD16
SNORD18A
SNORD18B
SNORD18C
SNORD3D
SNORD4A
SNORD4B
SNORD79
SNORD80
SNORD81
SPACA6P-AS
SPAG5-AS1
SPATA8
SPATA8-AS1
SRD5A3-AS1
SRRM2-AS1
SSBP3-AS1
SSTR5-AS1
ST20-AS1
ST7-AS1
STARD7-AS1
STEAP3-AS1
SYNE1-AS1
TALAM1
TAPT1-AS1
TCL6
TEX41
TFAP2A-AS1
THAP7-AS1
TLX1NB
TM4SF19-AS1
TMEM254-AS1
TPRG1-AS2
TPT1-AS1
TRAF3IP2-AS1
TRHDE-AS1
TRU-TCA1-1
TSIX
TTC28-AS1
TTC3-AS1
TTLL10-AS1
TTN-AS1
UBA6-AS1
UMODL1-AS1
USP2-AS1
VAC14-AS1
VIM-AS1
VPS13A-AS1
VPS9D1-AS1
WASHC5-AS1
WDFY3-AS2
WEE2-AS1
WT1-AS
WWTR1-AS1
XIST
YEATS2-AS1
ZBED3-AS1
ZBTB11-AS1
ZEB2-AS1
ZMYM4-AS1
ZNF22-AS1
ZNF295-AS1
ZNF337-AS1
ZNF436-AS1
ZNF503-AS2
ZNF571-AS1
ZNF667-AS1
ZSCAN16-AS1
ZSWIM8-AS1
